# Supplementary material for: Novel cargo-binding site in the β and δ subunits of coatomer
Source: PubMed Central journal article supplement — J Cell Biol. 2007 Oct 22;179(2):209–17. doi: 10.1083/jcb.200704142 (PMC2064757; doi:10.1083/jcb.200704142), 2007-10-22
Supplement: jcellbiol_jcb.200704142_4.pdf [file jcellbiol_jcb.200704142_4.pdf]

**Table S1.** Plasmids.

| Plasmid | Description                                   | Source                 |
|---------|-----------------------------------------------|------------------------|
| pL569   | <i>PMP2</i> -GFP-LRKRS- in p416               | Michelsen et al., 2006 |
| pG350   | <i>PMP2</i> -GFP-LRKRS- in p415               | This study             |
| pL571   | <i>PMP2</i> -GFP-KKXX in p416                 | This study             |
| pR866   | <i>PMP2</i> -GFP-KKXX in p415                 | This study             |
| pL570   | <i>PMP2</i> -GFP-AAAAS- in p416               | Michelsen et al., 2006 |
| pL572   | <i>PMP2</i> -GFP-AAXX in p416                 | This study             |
| pM650   | <i>PMP2</i> -YFP-LRKRS- in p416               | Michelsen et al., 2006 |
| pN654   | <i>PMP2</i> -YFP-KKXX in p416                 | Michelsen et al., 2006 |
| pN655   | <i>PMP2</i> -YFP-AAXX in p416                 | Michelsen et al., 2006 |
| pR889   | <i>PMP2</i> -YFP-KLRRRRI- in p416             | This study             |
| pR890   | <i>PMP2</i> -YFP-NVRNRRK- in p416             | This study             |
| pO732   | <i>GST-MST27</i> -KKXX in pGEX 6P             | Sandmann et al., 2003  |
| pF291   | <i>GST-MST27</i> -LRKR- in pGEX 6P            | This study             |
| pO724   | -ML-KLRRRRI- in pGAD T7                       | Zerangue et al., 2001  |
| pO725   | -ML-NVRNRRK- in pGAD T7                       | Zerangue et al., 2001  |
| pH376   | Bovine alpha-COP in pBD                       | Faulstich et al., 1996 |
| pH378   | Bovine beta'-COP in pAS                       | Faulstich et al., 1996 |
| pH379   | Bovine gamma-COP in pAS                       | Faulstich et al., 1996 |
| pH381   | Bovine delta-COP in pAS                       | Faulstich et al., 1996 |
| pO730   | Yeast beta-COP in pAS                         | This study             |
| pO740   | Bovine delta-COP 1-399 in pAS                 | This study             |
| pO741   | Bovine delta-COP 1-388 in pAS                 | This study             |
| pO742   | Bovine delta-COP $\Delta$ 388-413 in pAS      | This study             |
| pO743   | Yeast beta-COP 211-973 in pAS                 | This study             |
| pO744   | Yeast beta-COP 310-973 in pAS                 | This study             |
| pO745   | Yeast beta-COP 341-973 in pAS                 | This study             |
| pO746   | Yeast beta-COP 367-973 in pAS                 | This study             |
| pO747   | Yeast beta-COP $\Delta$ 318-338 in pAS        | This study             |
| pO729   | Yeast beta-COP in pGAD T7                     | This study             |
| pQ849   | <i>ret2-1</i> in p416                         | This study             |
| pQ828   | <i>RET2</i> in pRS303                         | This study             |
| pR856   | <i>RET2</i> $\Delta$ 414-435 in pRS303        | This study             |
| pP783   | Yeast <i>sec26::natMX4</i> in pcDNA3          | This study             |
| pR892   | Yeast <i>SEC26</i> $\Delta$ 318-338 in BFGIII | This study             |
| pR893   | 2 $\mu$ <i>SEC26</i>                          | Duden et al., 1994     |
| pR894   | <i>SEC26</i> <sup>334</sup> DLD/NAN in p415   | This study             |
| pR895   | <i>SEC26</i> <sup>325</sup> DILR/NAAA in p415 | This study             |
| pR896   | <i>SEC26</i> in p415                          | This study             |
| pR897   | <i>SEC26</i> $\Delta$ 318-338 in p415         | This study             |
| GA74    | CD4GFP-KLRRRRI in pcDNA3                      | Zerangue et al., 2001  |
| 44      | CD4GFP-NVRNRRK in pcDNA3                      | Zerangue et al., 2001  |

**Table S2. Strains.**

| <i>S. cerevisiae</i> strains | Genotype or characteristics                                                                                                                                                                                                       | Source                  |
|------------------------------|-----------------------------------------------------------------------------------------------------------------------------------------------------------------------------------------------------------------------------------|-------------------------|
| Y00000                       | BY4741, MATa, his3Δ1, leu2Δ0, met15Δ0, ura3Δ0                                                                                                                                                                                     | Euroscarf               |
| Y01469<br>Δsec28             | BY4741, MATa, his3Δ1, leu2Δ0, met15Δ0, ura3Δ0, YIL076w::kanMX4                                                                                                                                                                    | Euroscarf               |
| PC133<br>ret2-1              | Mat alpha, ura3, lys2, his4, suc2Δ9, ret2-1                                                                                                                                                                                       | Cosson et al., 1996     |
| EGY101<br>ret1-1             | MATa, ura3, leu2, his3, trp1, suc2Δ9, ret1-1                                                                                                                                                                                      | Letourneur et al., 1994 |
| RDY122<br>GAL1::SEC26        | MAT alpha, ura3-52, leu2Δ-1, his3Δ-200, lys2-801, ade2-101, GAL2, Δsec26::HIS3, pCEN GAL1::SEC26::TRP1                                                                                                                            | Duden et al., 1994      |
| Y25865<br>ret2::kanMX4/RET2  | BY4743, Mat alpha/a, his3Δ1/his3Δ1, leu2Δ0/leu2Δ0, lys2Δ0/LYS2, MET15/met15Δ0, ura3Δ0/ura3Δ0, YFR051c::kanMX4/YFR051c                                                                                                             | Euroscarf               |
| Y25865-KM1                   | Mat a, his3Δ1, leu2Δ0, met15Δ0, ura3Δ0, YFR051c::kanMX4, pRS303RET2                                                                                                                                                               | This study              |
| Y25865-KM2                   | Mat a, his3Δ1, leu2Δ0, met15Δ0, ura3Δ0, YFR051c::kanMX4, pRS303RET2Δ414-435                                                                                                                                                       | This study              |
| Y25865-KM3                   | Mat a, his3Δ1, leu2Δ0, met15Δ0, ura3Δ0, YFR051c::kanMX4, pRS303RET2, sec26::natMX4, p415SEC26Δ318-338                                                                                                                             | This study              |
| Y25865-KM4                   | Mat a, his3Δ1, leu2Δ0, met15Δ0, ura3Δ0, YFR051c::kanMX4, pRS303RET2Δ414-435, sec26::natMX4, p415SEC26 <sup>334</sup> DLD/NAN                                                                                                      | This study              |
| AH109                        | Mat a, trp1-901, leu2-3, 112, ura3-52, his3-200, gal4Δ, gal80Δ, LYS2GAL1 <sub>UAS</sub> -GAL1 <sub>TATA</sub> -HIS3, GAL2 <sub>UAS</sub> -GAL2 <sub>TATA</sub> -ADE2, URA3::MEL1 <sub>UAS</sub> -MEL1 <sub>TATA</sub> -lacZ, MEL1 | Clontech                |
| Euroscarf library            | COMP-SET 1-A                                                                                                                                                                                                                      | Euroscarf               |
| TetO7 Library                | Yeast Tet-promoters Hughes Collection                                                                                                                                                                                             | Open Biosystems         |

## References

- Cosson, P., C. Démollière, S. Hennecke, R. Duden, and F. Letourneur. 1996. Delta- and zeta-COP, two coatomer subunits homologous to clathrin-associated proteins, are involved in ER retrieval. *EMBO J.* 15:1792–1798.
- Duden, R., M. Hosobuchi, S. Hamamoto, M. Winey, B. Byers, and R. Schekman. 1994. Yeast beta- and beta'-coat proteins (COP). Two coatomer subunits essential for endoplasmic reticulum-to-Golgi protein traffic. *J. Biol. Chem.* 269:24486–24495.
- Faulstich, D., S. Auerbach, L. Orci, M. Ravazzola, S. Wegchingel, F. Lottspeich, G. Stenbeck, C. Harter, F.T. Wieland, and H. Tschochner. 1996. Architecture of coatomer: molecular characterization of delta-COP and protein interactions within the complex. *J. Cell Biol.* 135:53–61.
- Letourneur, F., E.C. Gaynor, S. Hennecke, C. Demolliere, R. Duden, S.D. Emr, H. Riezman, and P. Cosson. 1994. Coatomer is essential for retrieval of dilysine-tagged proteins to the endoplasmic reticulum. *Cell.* 79:1199–1207.
- Michelsen, K., T. Mrowiec, K.E. Duderstadt, S. Frey, D.L. Minor, M.P. Mayer, and B. Schwappach. 2006. A multimeric membrane protein reveals 14-3-3 isoform specificity in forward transport in yeast. *Traffic.* 7:903–916.
- Sandmann, T., J.M. Herrmann, J. Dengjel, H. Schwarz, and A. Spang. 2003. Suppression of coatomer mutants by a new protein family with COPI and COPII binding motifs in *Saccharomyces cerevisiae*. *Mol. Biol. Cell.* 14:3097–3113.
- Zerangue, N., M.J. Malan, S.R. Fried, P.F. Dazin, Y.N. Jan, L.Y. Jan, and B. Schwappach. 2001. Analysis of endoplasmic reticulum trafficking signals by combinatorial screening in mammalian cells. *Proc. Natl. Acad. Sci. USA.* 98:2431–2436.
